# Supplementary material for: Altered lignification in mur1-1 a mutant deficient in GDP-L-fucose synthesis with reduced RG-II cross linking
Source: PubMed Central journal article supplement (PMC5621668; doi:10.1371/journal.pone.0184820), 2017-09-29
Supplement: pone.0184820.s001.pdf [file pone.0184820.s001.pdf]

# Figure S1

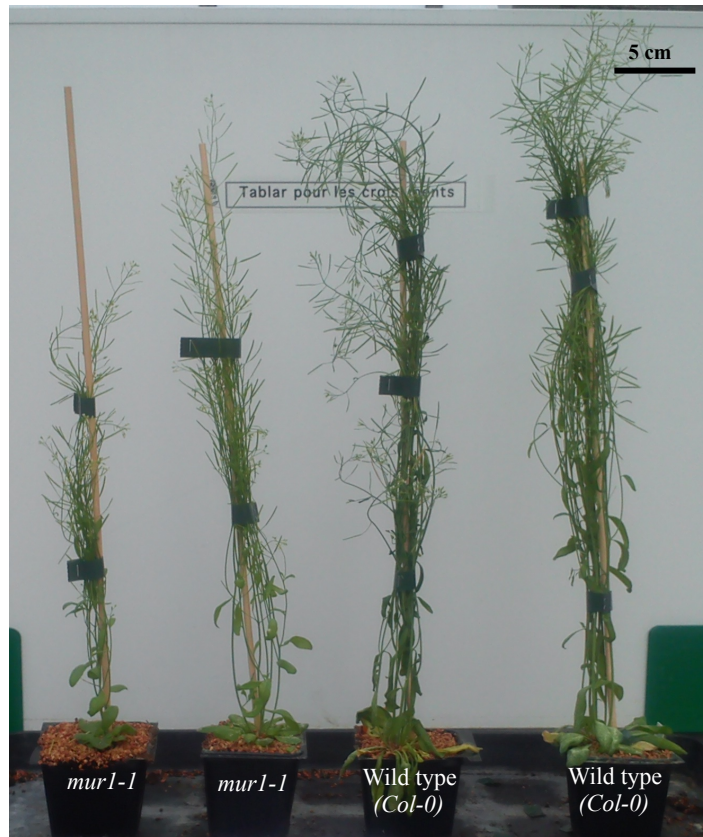

Figure S1 : Phenotype of mature *mur1-1* and wild-type plants.
