# Supplementary material for: Altered lignification in mur1-1 a mutant deficient in GDP-L-fucose synthesis with reduced RG-II cross linking
Source: PubMed Central journal article supplement (PMC5621668; doi:10.1371/journal.pone.0184820), 2017-09-29
Supplement: pone.0184820.s003.pdf [file pone.0184820.s003.pdf]

Figure S3

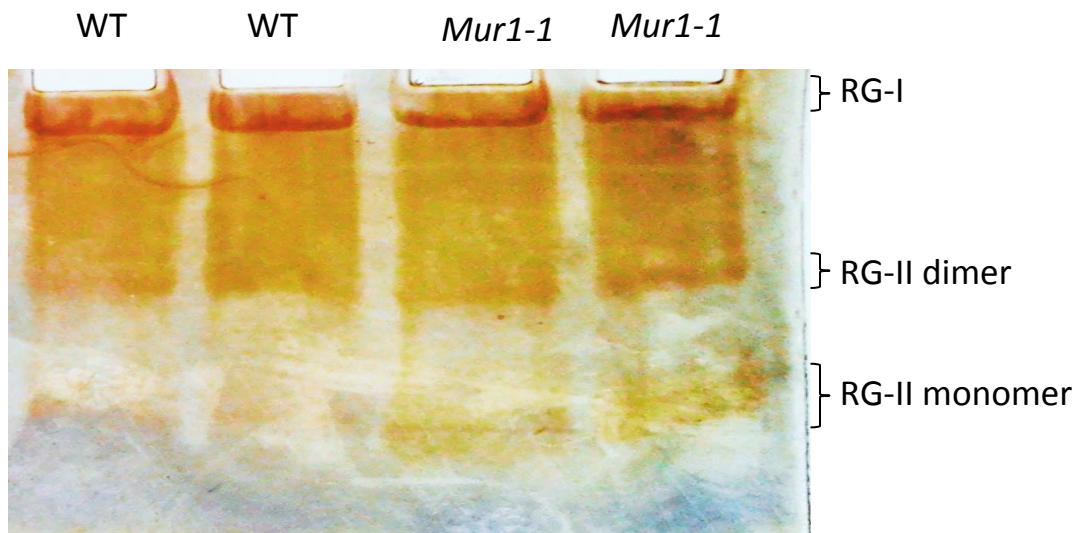

Figure S3 : Polyacrylamide gel electrophoresis of RG-II.
