# Supplementary material for: Altered lignification in mur1-1 a mutant deficient in GDP-L-fucose synthesis with reduced RG-II cross linking
Source: PubMed Central journal article supplement (PMC5621668; doi:10.1371/journal.pone.0184820), 2017-09-29
Supplement: pone.0184820.s005.pdf [file pone.0184820.s005.pdf]

## S1 Table

**Relative frequencies of lignin-derived Guaiacyl and Syringyl pyrolysis products from extractive-free mature stems.**

| <b>Line</b>          | <b>% Guaiacyl</b>         | <b>% Syringyl</b>         |
|----------------------|---------------------------|---------------------------|
| <b><i>mur1-1</i></b> | <b>80.0 (79.9; 81.1)*</b> | <b>20.0 (18.9; 20.1)*</b> |
| <b>Wild type</b>     | 77.8 (76.0; 78.7)         | 22.2 (21.3; 24)           |

\* indicates significant differences (Kruskal Wallis test) compared to the wild-type value at  $P < 0.05$ .
