# Supplementary material for: Altered lignification in mur1-1 a mutant deficient in GDP-L-fucose synthesis with reduced RG-II cross linking
Source: PubMed Central journal article supplement (PMC5621668; doi:10.1371/journal.pone.0184820), 2017-09-29
Supplement: pone.0184820.s006.pdf [file pone.0184820.s006.pdf]

**S2 Table****Secondary cell wall related genes over-expressed in *mur1-1*.**

| <b>Secondary cell wall</b> |                  |                                        | <b>Mutant/wild-type<br/>(fold change)</b> |
|----------------------------|------------------|----------------------------------------|-------------------------------------------|
| <b>Lignin</b>              |                  |                                        |                                           |
| At2g29130                  | LAC2             | Putative laccase                       | 2.23                                      |
| At5g03260                  | LAC11            | Lignin laccase                         | 1.72                                      |
| At5g05390                  | LAC12            | Putative laccase                       | 3.23                                      |
| At5g60020                  | LAC17            | Lignin laccase                         | 2.39                                      |
| At5g42180                  | PER64            | Lignin peroxidase                      | 4.5                                       |
| At5g51890                  | PEROXIDASE       | Arabidopsis ortholog of ZPO-C          | 1.78                                      |
| <b>Xylan</b>               |                  |                                        |                                           |
| At1g33800                  | GXM1             | Glucuronoxylan methyltransferase       | 1.96                                      |
| At4g09990                  | GXM2             | Glucuronoxylan methyltransferase       | 2.62                                      |
| At1g09610                  | GXM3             | Glucuronoxylan methyltransferase       | 2.46                                      |
| At3g18660                  | GUX1             | Glucuronic acid substitution of xylan  | 1.82                                      |
| At1g19300                  | PARVUS           | Glycosyltransferase putative (GT8)     | 2.00                                      |
| At2g37090                  | IRX9             | Glycosyltransferase putative (GT43)    | 2.27                                      |
| At1g27440                  | IRX10/GUT2       | Glucuronoxylan glucuronosyltransferase | 1.71                                      |
| At5g59290                  | UXS3             | UDP-Glucuronic acid decarboxylase      | 2.64                                      |
| At2g28760                  | UXS6             | UDP-Glucuronic acid decarboxylase      | 1.78                                      |
| At3g50220                  | IRX15            | DUF579                                 | 1.78                                      |
| At5g17420                  | MUR10/IRX3/CESA7 | Cellulose synthase                     | 2.91                                      |

| <b>Cellulose</b>             |            |                                                             |      |
|------------------------------|------------|-------------------------------------------------------------|------|
| At5g44030                    | IRX5/CESA4 | Cellulose synthase                                          | 2.38 |
| At4g18780                    | CESA8/IRX1 | Cellulose synthase                                          | 2.35 |
| <b>Transcription factors</b> |            |                                                             |      |
| At1g32770                    | SND1       | NAC-domain transcription factor                             | 1.97 |
| At4g28500                    | SND2       | NAC-domain transcription factor                             | 1.91 |
| At5g62380                    | VND6       | NAC-domain transcription factor                             | 2.38 |
| At5g12870                    | MYB46      | Member of the R2R3 factor gene family                       | 2.69 |
| At1g16490                    | MYB58      | Member of the R2R3 factor gene family                       | 1.92 |
| At1g63910                    | MYB103     | Positive regulation of syringal lignin biosynthetic process | 1.93 |
| <b>Other</b>                 |            |                                                             |      |
| At5g54690                    | IRX8       | Putative galacturonosyltransferase                          | 1.96 |
| At5g15630                    | IRX6/COBL4 | Member of the COBRA family                                  | 2.01 |
| At4g17220                    | MAP70-5    | Microtubule Associated Protein 70-5                         | 1.88 |
| At1g27920                    | MAP65-8    | Microtubule Associated Protein 65-8                         | 1.75 |
| At5g01360                    | TBL3       | Methyltransferase                                           | 2.25 |
| <b>Xylem formation</b>       |            |                                                             |      |
| At4g35350                    | XCP1       | Xylem cysteine peptidase                                    | 1.71 |
| At1g20850                    | XCP2       | Xylem cysteine peptidase                                    | 2.04 |
| At1g43790                    | TED6       | Tracheary element differentiation-related                   | 1.77 |
