# Supplementary material for: Altered lignification in mur1-1 a mutant deficient in GDP-L-fucose synthesis with reduced RG-II cross linking
Source: PubMed Central journal article supplement (PMC5621668; doi:10.1371/journal.pone.0184820), 2017-09-29
Supplement: pone.0184820.s007.pdf [file pone.0184820.s007.pdf]

**S3 Table****List of jasmonic acid-related genes overexpressed in *mur1-1*.**

| <b>Jasmonic acid-related</b>        |        |                                                                         | <b>Mutant/wild-type<br/>(fold change)</b> |
|-------------------------------------|--------|-------------------------------------------------------------------------|-------------------------------------------|
| <b>JASMONATE-ZIM-DOMAIN PROTEIN</b> |        |                                                                         |                                           |
| At1g19180                           | JAZ1   |                                                                         | 2.07                                      |
| At1g74950                           | JAZ2   |                                                                         | 2.13                                      |
| At1g17380                           | JAZ5   |                                                                         | 2.58                                      |
| At2g34600                           | JAZ7   |                                                                         | 7.78                                      |
| At1g30135                           | JAZ8   |                                                                         | 5.82                                      |
| At1g70700                           | JAZ9   |                                                                         | 2.57                                      |
| At5g13220                           | JAZ10  |                                                                         | 10.13                                     |
| <b>JA biosynthesis</b>              |        |                                                                         |                                           |
| At3g45140                           | LOX2   | Lipoxygenase                                                            | 5.58                                      |
| At1g72520                           | LOX4   |                                                                         | 1.78                                      |
| At2g06050                           | OPR3   | Oxophytodienoate-reductase                                              | 1.79                                      |
| <b>Transcription factors</b>        |        |                                                                         |                                           |
| At1g43160                           | RAP2.6 | Related to AP2.6                                                        | 3.2                                       |
| At1g74930                           | ORA47  | Member of the DREB subfamily A-5 of ERF/AP2 transcription factor family | 4.44                                      |
| At4g17500                           | ERF1   | Ethylene Responsive element binding Factor 1                            | 2.48                                      |
| At2g44840                           | ERF13  | Ethylene Responsive element binding Factor 13                           | 5.21                                      |
| At4g34410                           | RRTF1  | Redox Responsive Transcription Factor 1                                 | 4.63                                      |
| At1g12610                           | DDF1   | Dwarf and Delayed Flowering 1                                           | 2.36                                      |

|           |        |                                              |      |
|-----------|--------|----------------------------------------------|------|
| At1g80840 | WRKY40 | WRKY DNA-Binding protein 40                  | 2.14 |
| At2g46510 | AIB    | ABA-Inducible BHLH-type transcription factor | 1.8  |
| At3g23250 | MYB15  | MYB domain protein 15                        | 2.3  |
| At4g37260 | MYB73  | MYB domain protein 73                        | 1.83 |
